# Supplementary material
Source: PubMed Central journal article supplement (PMC3873824)
Supplement: NIHMS178500-supplement-Supp_info.pdf [file NIHMS178500-supplement-Supp_info.pdf]

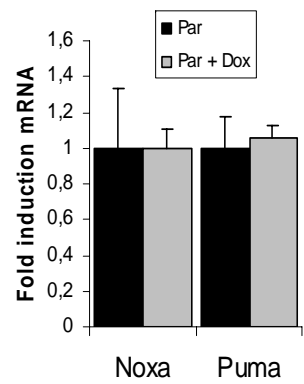

**Supplemental material:**

Primer sequences used for Realtime qRT-PCR:

Cyclophilin A:

sense: 5'-GTCTTGGCAGTGCAGATGAA-3'

antisense: 5'-GCGTCTCCTTTGAGCTGTTT-3'

Noxa:

sense: 5'-TGTCCGAGGTGCTCCAGTT-3'

antisense: 5'-TGAAACGTGCACCTCCTG-3'

PUMA:

sense: 5'-GCCAGATTTGTGAGACAAGAGG-3'

antisense: 5'-CAGGCACCTAATTGGGCTC-3'

**Supplemental Figure:**

Treatment with Doxycycline alone does not change basal Noxa and PUMA expression in parental cells. Realtime qRT-PCR of parental cells induced with Dox for 48 hrs or left untreated. Whiskers indicate standard error of triplicates.
